# Supplementary material for: A novel ratiometric fluorescence sensor for Zn2+detection
Source: Royal Society of Chemistry journal article supplement (doi:10.1039/c4ay01483a), 2014-01-01
Supplement: c4ay01483a1.pdf [file c4ay01483a1.pdf]

## Supplementary Material

# **A Novel Ratiometric Fluorescence Sensor for Zn<sup>2+</sup> Detection**

Liqiang Gu,<sup>a, b</sup> Xuejuan Wan,<sup>a, b, \*</sup> Haiyang Liu,<sup>b</sup> Tianqi Liu,<sup>b</sup> and Youwei Yao<sup>b, \*\*</sup>

<sup>a</sup> Shenzhen Key Laboratory of Special Functional Materials, College of Materials Science and Engineering, Shenzhen University, Shenzhen 518060, PR China,

<sup>b</sup>Advanced Materials Institute, Graduate School at Shenzhen, Tsinghua University, Shenzhen 518055, PR China.

\* Corresponding author. Tel: +86-0755-26534059, Fax: +86-0755-26534457

\*\* Corresponding author. Tel: +86-0755-26036796, Fax: +86-0755-26036796

*E-mail addresses:* wanxj@szu.edu.cn (X. Wan), yaoyw@sz.tsinghua.edu.cn (Y. Yao)

## 1 Materials and general methods

8-Aminoquinoline purchased from TCI was recrystallized from ethanol. Chloroacetyl chloride was purchased from Aladdin. Salicylhydrazide and *N,N*-diisopropylethylamine (DIPEA) was purchased from Cantotech, and used as received. Dichloromethane, methanol (MeOH) and acetonitrile (MeCN) were purchased from Guangdong Guanghua Sci-Tech Co.Ltd., and distilled under reduced pressure. Tris-HCl buffer solutions of different pH were prepared using proper amount of Tris and HCl (all of analytical grade) under adjustment by a pH meter. The precursor 2-chloro-*N*-(quinolin-8-yl)acetamide (**1b**) was prepared according to the reported procedure, which was prepared from 8-aminoquinoline (**1a**) and 2-chloroacetyl chloride in dichloromethane.

$^1\text{H}$  NMR(400 MHz) and  $^{13}\text{C}$  NMR(101 MHz) spectra were recorded on a Bruker Ultrashield TM 400 PLUS spectrometer. FT-IR spectra ( $4000\text{--}500\text{ cm}^{-1}$ ) in KBr were recorded on a Bruker VERTEX 70V spectrometer. Mass spectrum (MS) was obtained with a Waters Q-TOF premier Mass Spectrometer. UV-Vis spectroscopy measurements were acquired on a SCINCO S-4100 UV/Vis spectrophotometer. Fluorescence spectra were recorded using a Jobin Yvon FluoroLog-3-TCSPC spectrofluorometer.

## 2. Synthesis and Reactions

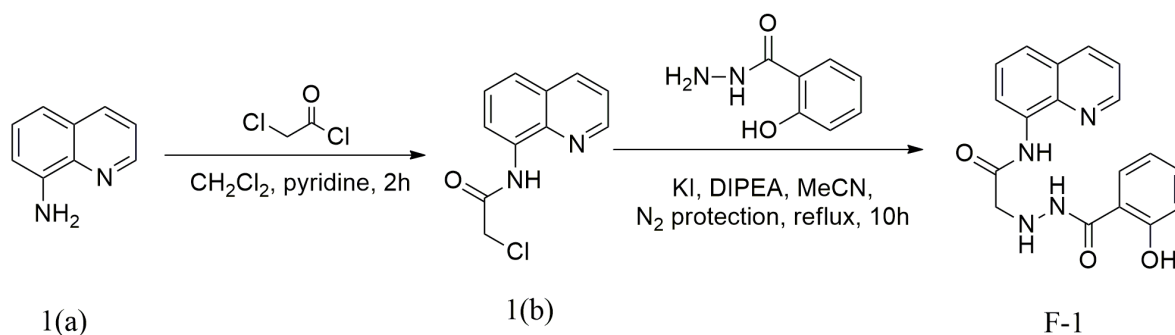

Scheme S1

2-(2-(2-hydroxybenzoyl)hydrazinyl)-*N*-(quinolin-8-yl)acetamide (**F-1**) was prepared as follows(Scheme 1): compound 1(b) (110 mg, 0.5 mmol), salicylhydrazide (152 mg, 1 mmol) and KI (25mg, 0.15 mmol) were dissolved in anhydrous MeCN (20 mL) with 1.0 mmol of DIPEA under nitrogen atmosphere. The yellow solution was stirred for 10 h under reflux; then the solvent was removed by rotary evaporation and the residue was directly purified by flash column chromatography (silica gel, petroleum ether/ethyl

acetate/Et<sub>3</sub>N = 1/1/0.01, v/v) to provide **F-1** (140 mg, yield 83.5%) as the yellow solid.

### 3 General spectroscopic procedures.

Stock solutions (0.01 M) of chlorinated salts K<sup>+</sup>, Cu<sup>2+</sup>, Fe<sup>2+</sup>, Al<sup>3+</sup>, Fe<sup>3+</sup>, Cr<sup>3+</sup>, Hg<sup>2+</sup>, Pb<sup>2+</sup>, Cd<sup>2+</sup> and Zn<sup>2+</sup> were first prepared with 10 mM Tris-HCl buffer solution (pH 7.0). Stock solution was prepared in methanol. Test solutions were prepared by placing calculation amount of the **F-1** stock solution into a test tube, adding an appropriate aliquot of each metal, and then diluting the solution to 3.0 mL with methanol and buffer solution. All fluorescence spectra were recorded 10 min after the addition of determinand at 25 °C with the excitation wavelength set at 340 nm (excitation/emission slit widths: 5 nm).

**Figure S1.** <sup>1</sup>H NMR spectrum of **F-1** in (CD<sub>3</sub>)<sub>2</sub>SO

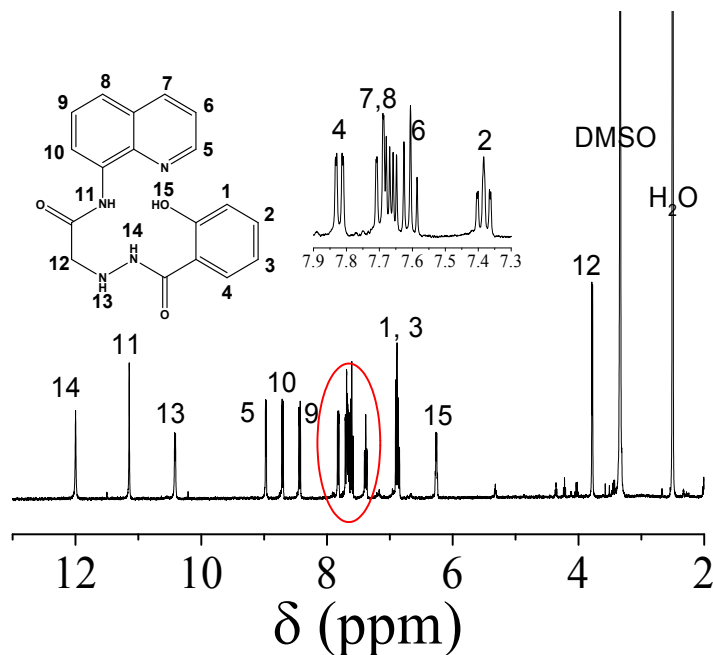

<sup>1</sup>H NMR (400 MHz, DMSO)  $\delta$  12.00 (s, 1H), 11.15 (s, 1H), 10.42 (d,  $J$  = 5.3 Hz, 1H), 8.97 (dd,  $J$  = 4.2, 1.6 Hz, 1H), 8.73 – 8.68 (m, 1H), 8.43 (dd,  $J$  = 8.3, 1.6 Hz, 1H), 7.82 (dd,  $J$  = 8.0, 1.5 Hz, 1H), 7.72 – 7.64 (m, 2H), 7.61 (t,  $J$  = 7.9 Hz, 1H), 7.42 – 7.35 (m, 1H), 6.88 (dd,  $J$  = 16.0, 7.9 Hz, 2H), 6.26 (d,  $J$  = 4.9 Hz, 1H), 3.78 (d,  $J$  = 4.5 Hz, 2H).

**Figure S2.**  $^{13}\text{C}$  NMR spectrum of **F-1** in  $(\text{CD}_3)_2\text{SO}$

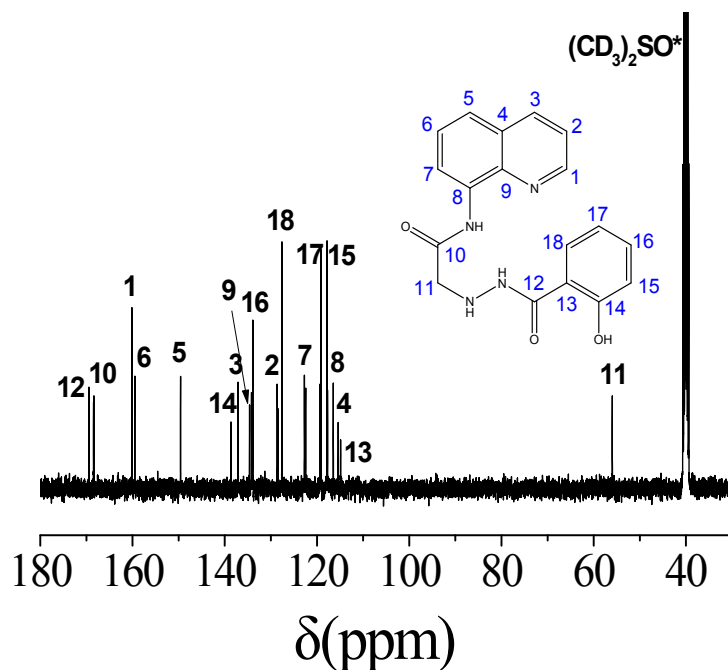

$^{13}\text{C}$  NMR (101 MHz, DMSO)  $\delta$  169.45 (C12, s), 168.39 (C10, d,  $J = 8.7$  Hz), 160.12 (C1, s), 159.49 (C6, s), 149.57 (C5, s), 138.66 (C14, s), 137.08 (C3, s), 134.62 (C9, s), 134.04 (C16, d,  $J = 28.9$  Hz), 128.51 (C2, d,  $J = 22.9$  Hz), 127.56 (C18, d,  $J = 5.5$  Hz), 122.58 (C7, d,  $J = 27.2$  Hz), 119.23 (C17, d,  $J = 18.7$  Hz), 117.75 (C15, d,  $J = 9.4$  Hz), 116.46 (C8, s), 115.40 (C4, s), 114.87 (C13, s), 55.98 (C11, s).

**Figure S3.** FT-IR spectrum of **F-1**

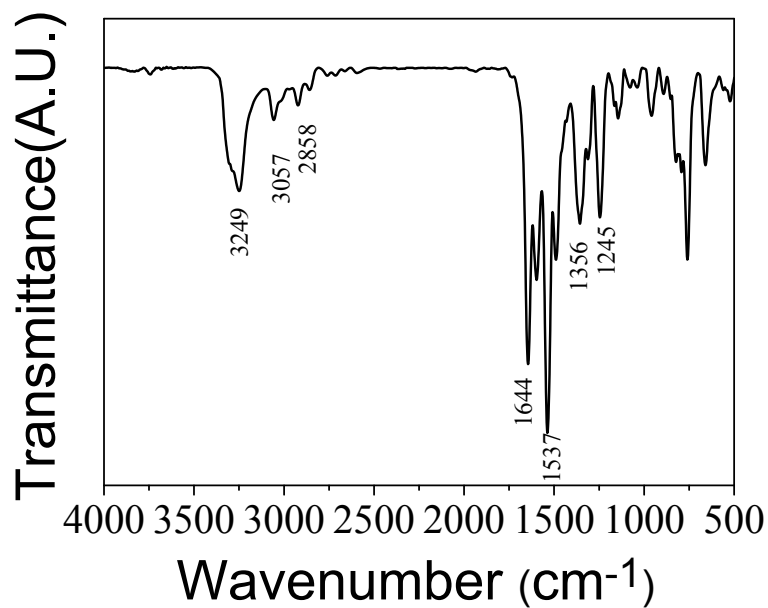

FT-IR (KBr): 1245  $\text{cm}^{-1}$  (Ph—N); 1356  $\text{cm}^{-1}$  (Ph—O); 1537  $\text{cm}^{-1}$  (N—H bending); 1644  $\text{cm}^{-1}$  (C=O); 2858  $\text{cm}^{-1}$ , 3057  $\text{cm}^{-1}$  (C—H); 3249  $\text{cm}^{-1}$  (O—H).

**Figure S4.** HR-MS spectrum of **F-1**

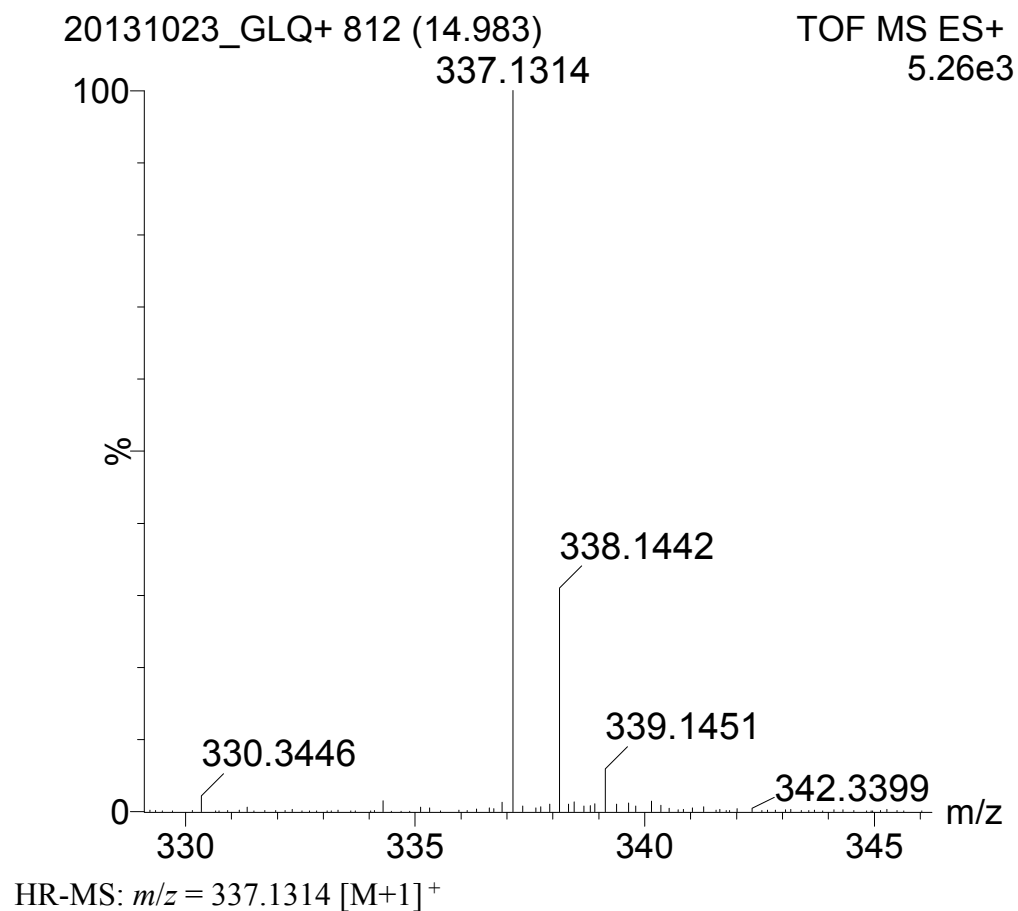

**Figure S5.** HR-MS spectrum of **F-1+Zn<sup>2+</sup>-H**

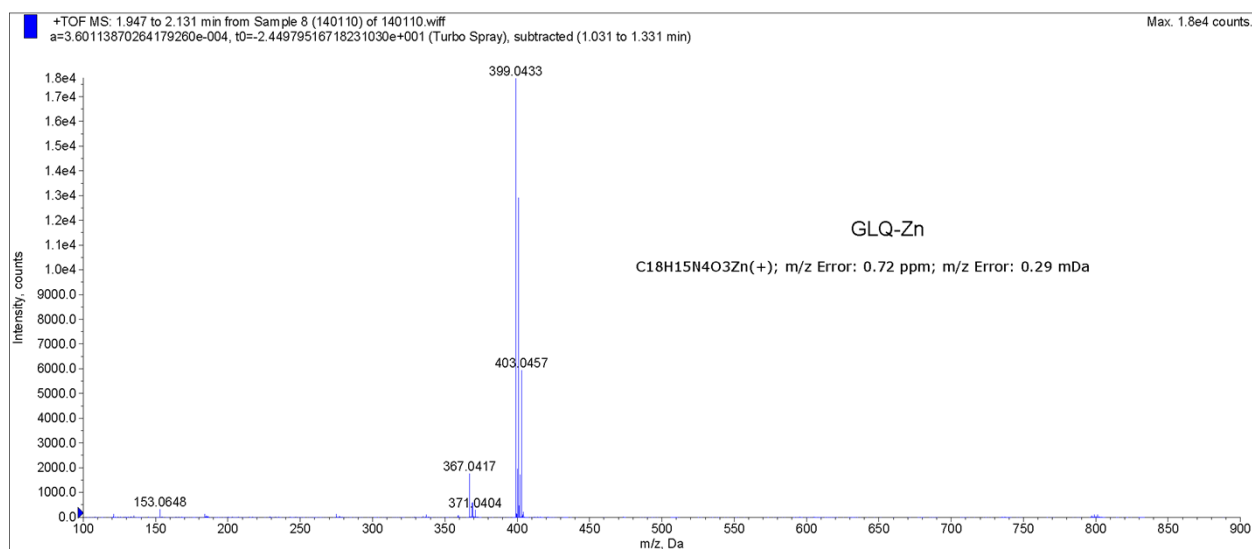

HR-MS:  $m/z = 399.0433 [F-1+Zn^{2+}-H]$
